# Supplementary material for: What is the evidence that differences in ‘control over destiny’ lead to socioeconomic inequalities in health? A theory-led systematic review of high-quality longitudinal studies on pathways in the living environment
Source: PubMed Central journal article supplement — J Epidemiol Community Health. 2019 Jun 21;73(10):929–34. doi: 10.1136/jech-2019-212565 (PMC6817698; doi:10.1136/jech-2019-212565), 2019-06-21
Supplement: jech-2019-212565supp001.pdf [file jech-2019-212565supp001.pdf]

**Web supplement 1: MEDLINE search strategy**

MEDLINE and MEDLINE In-Process

Ovid MEDLINE(R) In-Process & Other Non-Indexed Citations and Ovid MEDLINE(R) <1946 to Present>

Searched via OVID 28/06/17.

- 1 (social adj3 (disparit\$ or inequal\$ or inequit\$ or equit\$ or exclude\$ or exclusion or include\$ or inclusion or status or equality or gradient or hierarchy or class or determinant\$)).ti,ab.
- 2 (health adj3 (disparit\$ or inequal\$ or inequit\$ or equit\$ or equality or gradient or hierarchy or determinant\$)).ti,ab.
- 3 ((economic or material or structural) adj3 (disparit\$ or inequal\$ or inequit\$ or equit\$ or exclude\$ or exclusion or include\$ or inclusion or equality or gradient or hierarchy or class or determinant\$)).ti,ab.
- 4 ((socio-economic or socioeconomic) adj3 (disparit\$ or inequal\$ or inequit\$ or equit\$ or exclude\$ or exclusion or include\$ or inclusion or status or equality or gradient or hierarchy or determinant\$)).ti,ab.
- 5 (disadvantag\$ or vulnerab\$ or marginalis\$ or depriv\$).ti,ab.
- 6 (health adj1 gap).ti,ab.
- 7 Vulnerable Populations/
- 8 Socioeconomic Factors/ or poverty/ or social class/
- 9 or/1-8
- 10 ((perceive\$ or perception\$ or social or low\$ or high\$ or lack\$ or limit\$ or restrict\$ or personal or home or sense or desire or belief\$ or destiny or life) adj2 control\$).ti,ab.
- 11 ((civic\$ or stakeholder\$ or politic\$ or social or communit\$ or neighbourhood or neighborhood or local\$ or resident\$ or planning or public\$ or citizen\$) adj3 (participat\$ or involve\$ or engag\$ or collaborat\$ or consult\$)).ti,ab.
- 12 ((economic\$ or financial or personal) adj2 (freedom\$ or independen\$ or choice\$)).ti,ab.
- 13 autonom\$.ti,ab.
- 14 (disempower\$ or dis-empower\$ or empower\$ or powerless\$).ti,ab.
- 15 (politic\$ adj3 voice\$).ti,ab.
- 16 ((politic\$ or state) adj1 power).ti,ab.
- 17 ((self adj1 determination) or self-determination).ti,ab.
- 18 'decision latitude'.ti,ab.
- 19 'decision authority'.ti,ab.
- 20 'ontological security'.ti,ab.
- 21 ((participat\$ or involve\$) adj3 ('decision making' or decision-making)).ti,ab.
- 22 Personal autonomy/
- 23 Social participation/
- 24 \*'Power (Psychology)'/
- 25 (communit\$ adj2 develop\$).ti,ab.
- 26 salutogenesis.ti,ab.

|    |                                           |
|----|-------------------------------------------|
| 27 | 'sense of coherence'.ti,ab.               |
| 28 | or/10-27                                  |
| 29 | 9 and 28                                  |
| 30 | limit 29 to (english language and humans) |
